# Supplementary material
Source: Elsevier journal article supplement (https://www.sciencedirect.com/science/article/pii/S0009739X20301366)
Supplement: mmc1 [file S0009739X20301366:mmc1.docx]

**ANEXO I**

**ENCUESTA SOBRE DISCRIMINACIÓN, ABUSO, ACOSO Y *BURNOUT* EN RESIDENTES DE CIRUGÍA GENERAL**

**CARACTERÍSTICAS DEMOGRÁFICAS**

Indique su año de residencia:

1. R1
2. R2
3. R3
4. R4
5. R5

Género:

1. Mujer
2. Hombre

Año de nacimiento:

País de origen:

Número de camas de su hospital:

1. <200
2. 200-450
3. >450

¿Cuántos residentes hay por año en su servicio?

1. 1
2. 2
3. >2

Indique su comunidad autónoma:

**DISCRIMINACIÓN, ACOSO Y ABUSO**

Desde el inicio de la residencia, ¿con qué frecuencia…

1. ¿Se ha sentido discriminado por su género?
   1. Nunca
   2. Algunas veces al año
   3. Algunas veces al mes
   4. Algunas veces a la semana
   5. Diariamente
2. ¿Se ha sentido discriminado por su país de origen?
   1. Nunca
   2. Algunas veces al año
   3. Algunas veces al mes
   4. Algunas veces a la semana
   5. Diariamente

En caso de ser afirmativo, es causado por….

1. Pacientes y/o familiares
2. Cirujanos adjuntos
3. Cirujanos residentes
4. Otros profesionales

En caso de ser afirmativo, es causado por….

1. Pacientes y/o familiares
2. Cirujanos adjuntos
3. Cirujanos residentes
4. Otros profesionales
5. Se ha sentido discriminado por haber estado, estar o tener intención de estar embarazada y/o por necesitar tiempo para la atención de sus hijos (o ambos)?
   1. Nunca
   2. Algunas veces al año
   3. Algunas veces al mes
   4. Algunas veces a la semana
   5. Diariamente
   6. No procede
6. ¿Ha padecido acoso sexual?
   1. Nunca
   2. Algunas veces al año
   3. Algunas veces al mes
   4. Algunas veces a la semana
   5. Diariamente
7. ¿Ha experimentado abuso físico?
   1. Nunca
   2. Algunas veces al año
   3. Algunas veces al mes
   4. Algunas veces a la semana
   5. Diariamente
8. ¿Ha sufrido abuso verbal o psicológico?
   1. Nunca
   2. Algunas veces al año
   3. Algunas veces al mes
   4. Algunas veces a la semana
   5. Diariamente

En caso de ser afirmativo, es causado por….

1. Pacientes y/o familiares
2. Cirujanos adjuntos
3. Cirujanos residentes
4. Otros profesionales

En caso de ser afirmativo, es causado por….

1. Pacientes y/o familiares
2. Cirujanos adjuntos
3. Cirujanos residentes
4. Otros profesionales

En caso de ser afirmativo, es causado por….

1. Pacientes y/o familiares
2. Cirujanos adjuntos
3. Cirujanos residentes
4. Otros profesionales

En caso de ser afirmativo, es causado por….

1. Pacientes y/o familiares
2. Cirujanos adjuntos
3. Cirujanos residentes
4. Otros profesionales

**DESGASTE PROFESIONAL O *BURNOUT***

Señale la casilla que considere adecuada en cuanto a la frecuencia en que siente los siguientes enunciados:

|  | DIARIAMENTE | VARIAS VECES/ SEMANA | VARIAS VECES/ MES | VARIAS VECES/ AÑO | NUNCA |
| --- | --- | --- | --- | --- | --- |
| Creo que trato con mucha eficacia los problemas que presentan mis pacientes |  |  |  |  |  |
| Creo que estoy tratando mis pacientes como si fueran objetos impersonales |  |  |  |  |  |
| Siento que mi trabajo me está desgastando emocionalmente |  |  |  |  |  |
| Cuando me levanto por la mañana y me enfrento a otra jornada de trabajo me siento fatigado |  |  |  |  |  |
| Me he vuelto más insensible desde que empecé́ la residencia |  |  |  |  |  |
| Creo que con mi trabajo estoy influyendo positivamente en la vida de mis pacientes |  |  |  |  |  |
| Trabajar todo el día con pacientes me produce estrés |  |  |  |  |  |
| No me preocupa realmente lo que les ocurra a algunos de mis pacientes |  |  |  |  |  |
| Trabajar todo el día me supone un gran esfuerzo y me cansa |  |  |  |  |  |

1. ¿En los últimos 12 meses ha pensado en acabar con su vida?
   1. Sí
   2. No
2. En los últimos 6 meses, ¿cuántos meses su jornada laboral ha sobrepasado las 60 horas por semana?
   1. 0
   2. 1
   3. 2
   4. ≥3
3. Indique el número de guardias al mes que ha realizado de media en este último año:
   1. <=3
   2. 4-5
   3. >=6
4. ¿Libra las guardias?
   1. Sí
   2. No
